# Supplementary material for: Photochemistry of tyrosine dimer: when an oxidative lesion of proteins is able to photoinduce further damage
Source: Royal Society of Chemistry journal article supplement (doi:10.1039/c9pp00182d), 2019-04-30

## Electronic Supplementary Material

### TABLE OF CONTENTS

**S1. MS/MS spectrum recorded in ESI<sup>-</sup> mode of Tyr-DOPA.**

**S2. MS/MS spectrum recorded in ESI<sup>-</sup> mode of Tyr-dopaminochrome.**

**S3. Time evolution of the absorption spectrum in alkaline air-equilibrated aqueous solution containing: a) Cyt c (Fe<sup>+3</sup>) (14 μM) as a function of irradiation time ( $\lambda_{\text{irr}} = 320$  nm). b) Cyt c (Fe<sup>+3</sup>) (14 μM) and Tyr<sub>2</sub> (14 μM) in dark conditions as a function of time.**

**S4. Time evolution of the Tyr concentration in alkaline aqueous solutions under UV-A irradiation in the absence (●) and in the presence of Tyr<sub>2</sub> (▼). Inset: time evolution of the Tyr<sub>2</sub> concentrations in alkaline aqueous solutions under UV irradiation in the presence of Tyr.  $\lambda_{\text{exc}} = 320$  nm, [Tyr] = 8.0 μM, [Tyr<sub>2</sub>] = 63 μM, pH = 9.5.**

## S1. MS/MS spectrum recorded in ESI<sup>-</sup> mode of Tyr-DOPA

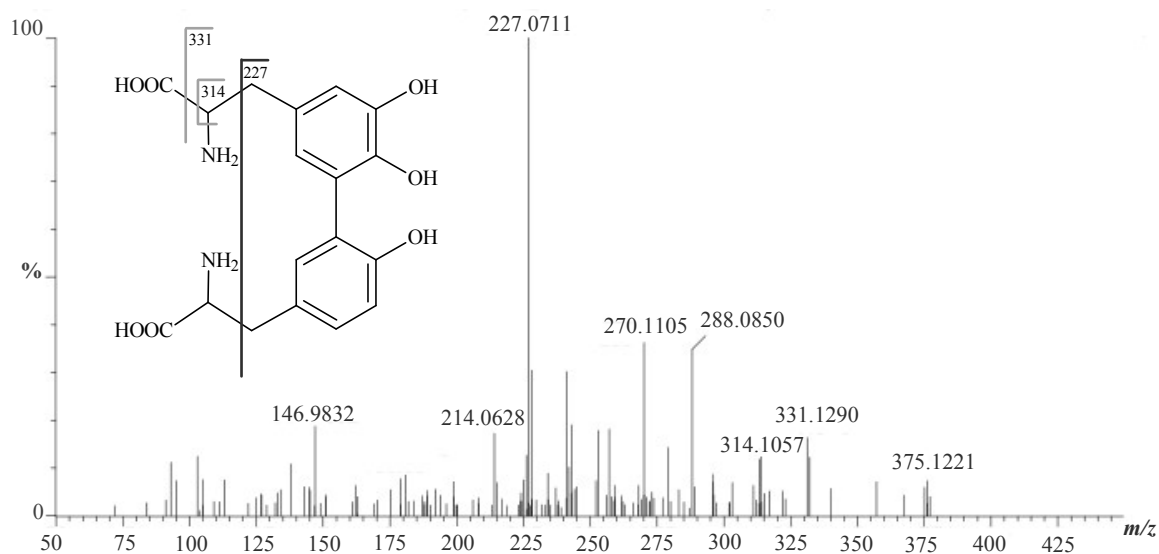

## S2. MS/MS spectrum recorded in ESI<sup>-</sup> mode of Tyr-dopaminochrome

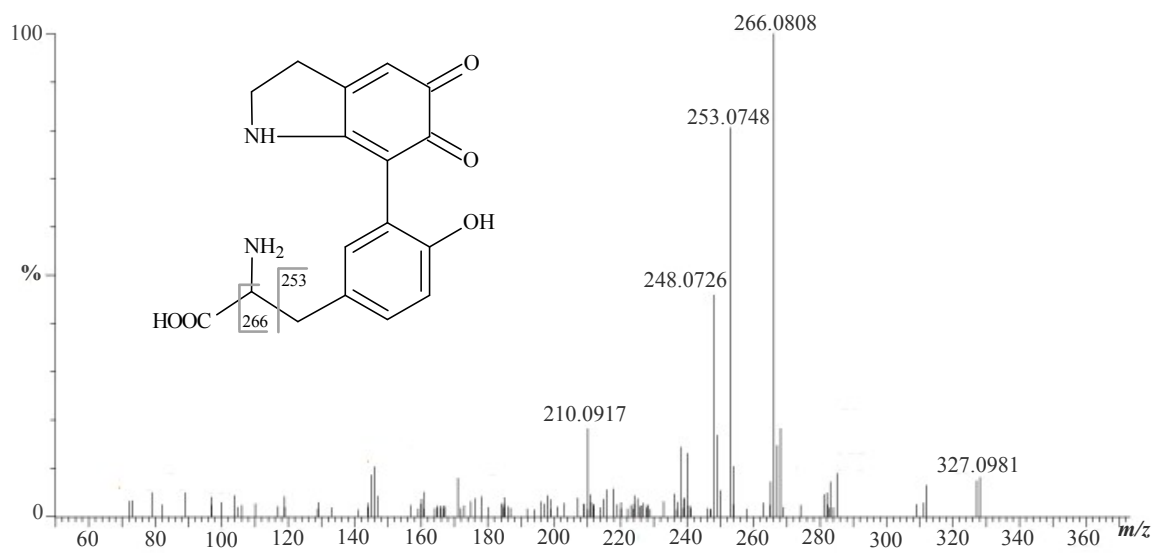

**S3. Time evolution of the absorption spectrum in alkaline air-equilibrated aqueous solution containing: a) Cyt c ( $\text{Fe}^{+3}$ ) ( $14 \mu\text{M}$ ) as a function of irradiation time ( $\lambda_{\text{irr}} = 320 \text{ nm}$ ). b) Cyt c ( $\text{Fe}^{+3}$ ) ( $14 \mu\text{M}$ ) and Tyr<sub>2</sub> ( $14 \mu\text{M}$ ) in dark conditions as a function of time.**

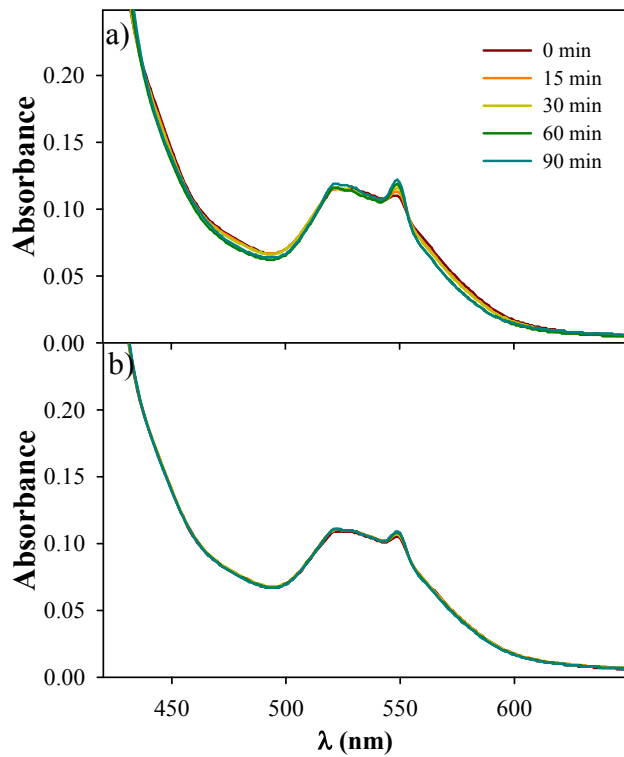

**S4. Time evolution of the Tyr concentration in alkaline aqueous solutions under UV-A irradiation in the absence (●) and in the presence of Tyr<sub>2</sub> (▼). Inset: time evolution of the Tyr<sub>2</sub> concentrations in alkaline aqueous solutions under UV irradiation in the presence of Tyr.  $\lambda_{exc}=320$  nm, [Tyr]= 8.0  $\mu$ M, [Tyr<sub>2</sub>]= 63  $\mu$ M, pH=9.5**

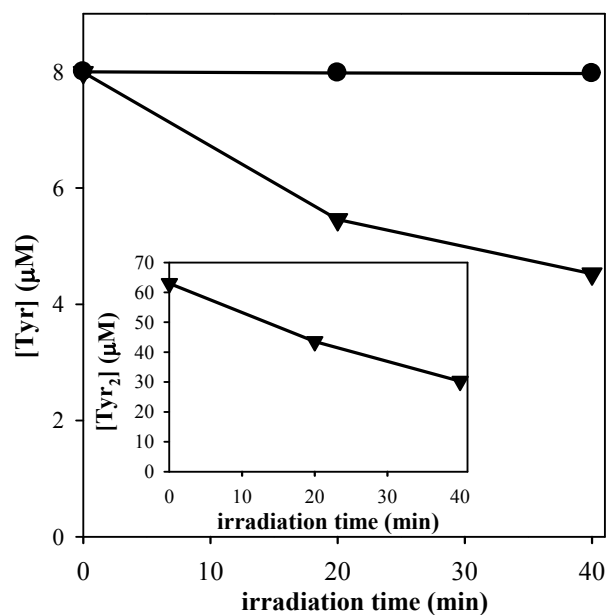

Supplement: c9pp00182d1.pdf [file c9pp00182d1.pdf]
